# Supplementary material for: Ketogenic diet and BHB rescue the fall of long-term potentiation in an Alzheimer’s mouse model and stimulates synaptic plasticity pathway enzymes
Source: PubMed Central journal article supplement (PMC10873348; doi:10.1038/s42003-024-05860-z), 2024-02-16
Supplement: 42003_2024_5860_MOESM1_ESM.pdf [file 42003_2024_5860_MOESM1_ESM.pdf]

Supplementary Figure 1

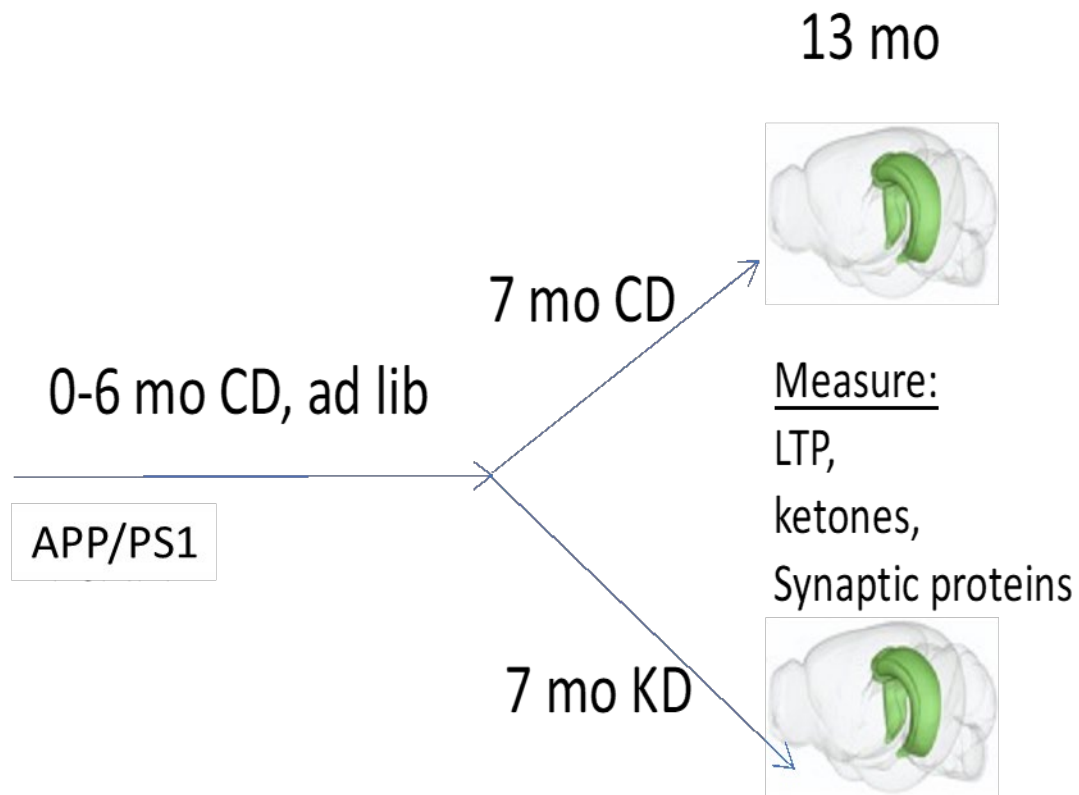

**Supplementary Figure 1:** Overall study design. 6 months old APP/PS1 were divided into two groups, one received a standard carbohydrate-rich diet (CD) for 7 months, while the other group received a ketogenic diet (KD). A 12-13 months of age mice were used for neurobehavior testing, LTP, ketones and biochemical measurements.

## Supplementary Figure 2

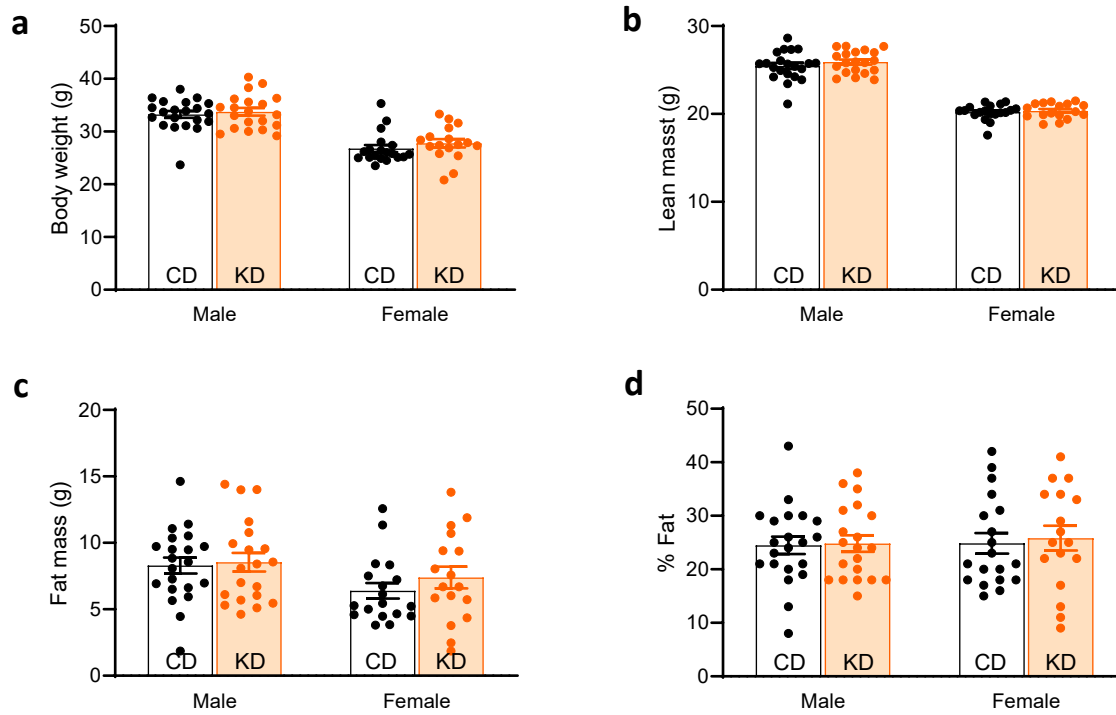

**Supplementary Figure 2:** Ketogenic diet does not alter body weight or composition in male or female APP/PS1 mice when fed in isocaloric amounts to a control diet. **a.** Body weight, **b.** Lean Mass, **c.** Fat Mass, and **d.** Percent Body Fat measured at 13-months of age did not significantly differ between male mice fed the control (CD) or ketogenic (KD) and female mice fed the CD or KD. (n=18-21). Data are presented as mean  $\pm$  SEM.

Supplementary Figure 3

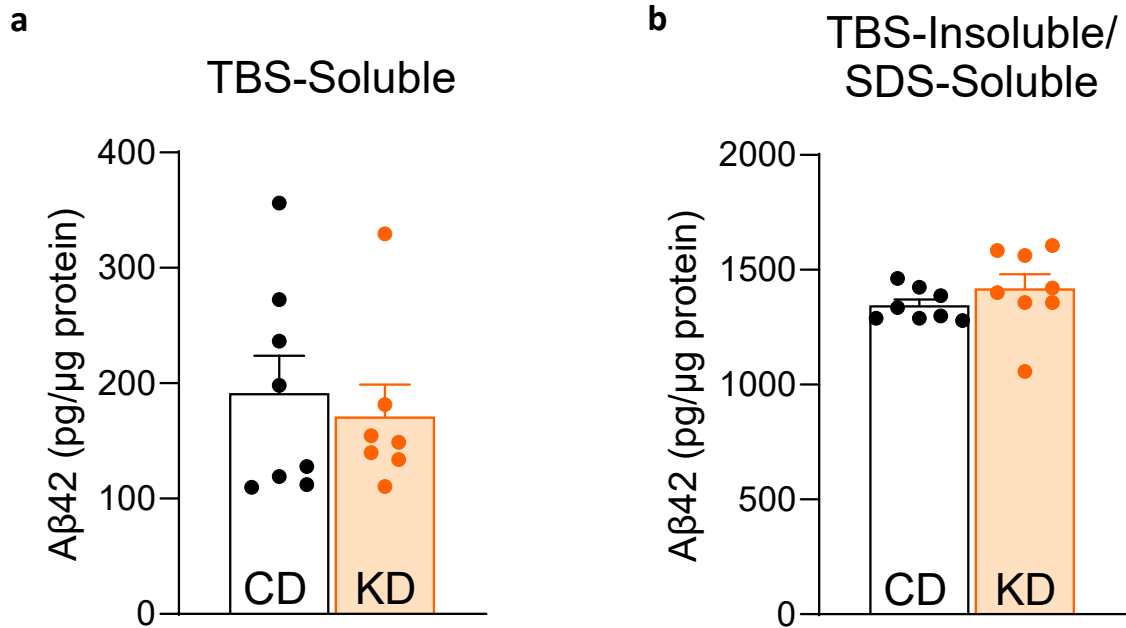

**Supplementary Figure 3:** Ketogenic diet does not reduce Aβ. **a-b.** The fresh brains were fractionated into TBS-soluble and TBS-insoluble, SDS-soluble fractions, which were used for ELISA quantification of Aβ42 (n=4 male and 4 female). Data are presented as mean ± SEM

Supplementary Figure 4

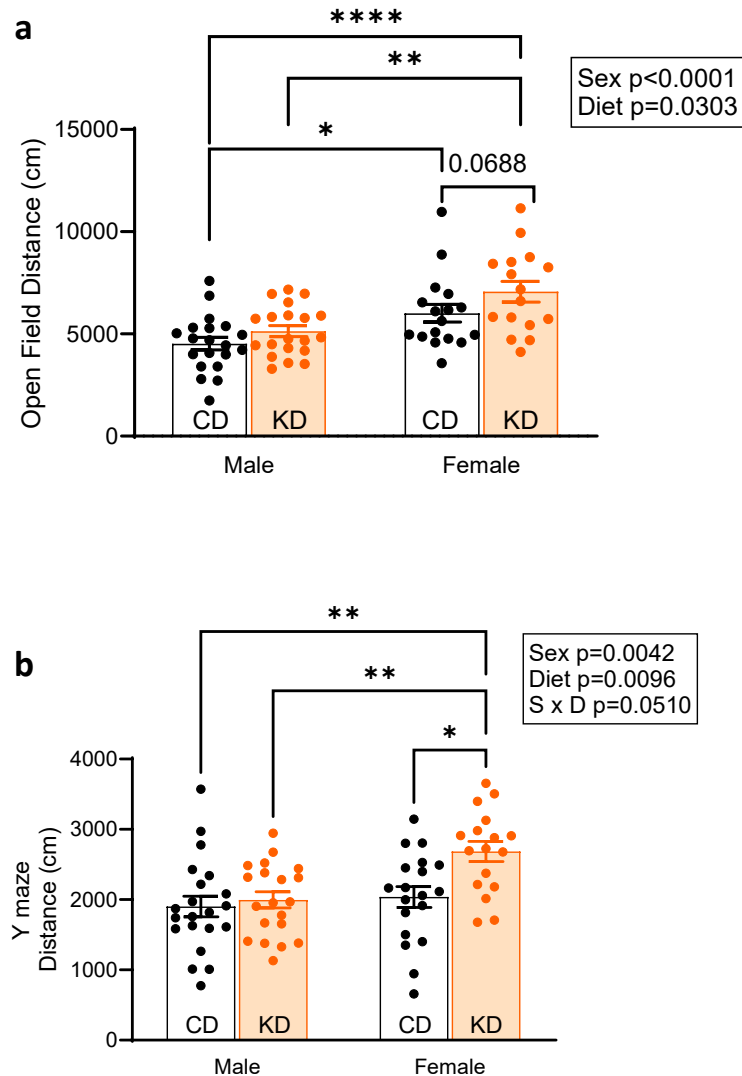

**Supplemental Figure 4: a.** Ketogenic diet increases distance traveled in an open field in APP/PS1 mice. Open field total distance covered was significantly increased in females and mice on a ketogenic diet ( $n=16-20$ ). Two-way ANOVA tests show significant differences between sexes ( $F(1, 69) = 20.53$ ,  $p < 0.0001$ ) and diet ( $F(1, 69) = 4.893$ ,  $p = 0.0303$ ). **b.** Ketogenic diet increases APP/PS1 mouse exploration in Y-maze. Both female mice and mice fed a ketogenic diet showed significant increase in distance traveled during y-maze ( $n=17-21$ ). Two-way ANOVA tests show significant differences between sexes ( $F(1, 73) = 8.754$ ,  $p = 0.0042$ ), diets, ( $F(1, 73) = 7.065$ ,  $p = 0.0096$ ) as well as an interaction between sex and diet ( $F(1, 73) = 3.935$ ,  $p = 0.0510$ ). Data are presented as mean  $\pm$  SEM and include individual data points. CD= Control diet, KD= Ketogenic Diet \* $p < 0.05$ , \*\* $p < 0.01$ , \*\*\*\* $p < 0.0001$

Supplementary Figure 5

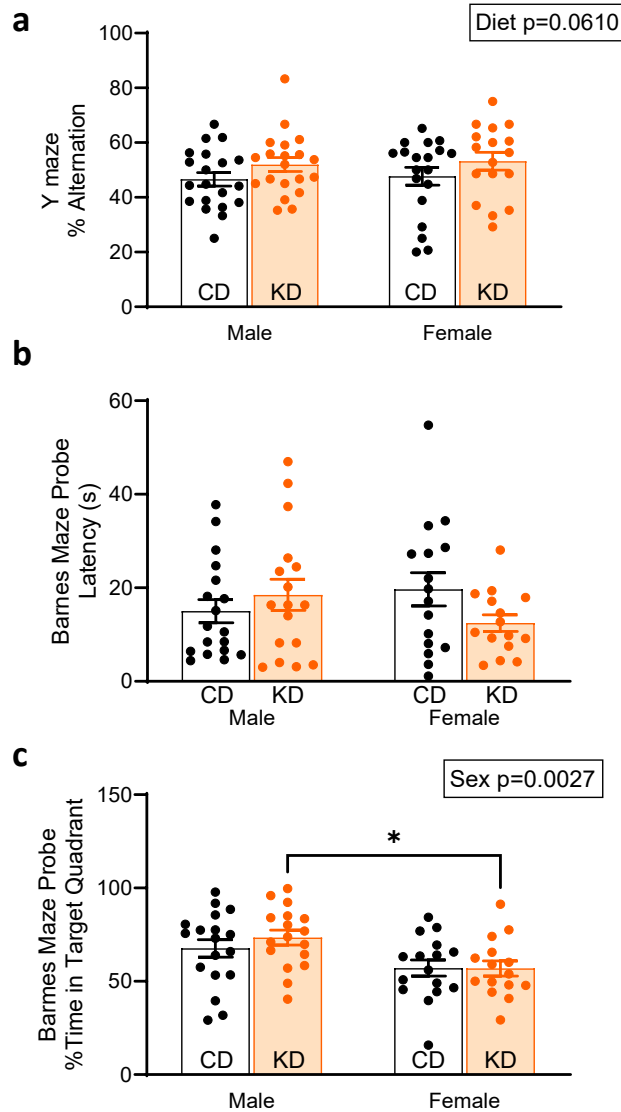

**Supplementary Figure 5:** Trend for improved working memory in ketogenic diet fed APP/PS1 mice. **a.** Y-maze % alternating triplets was determined in control (CD) and ketogenic (KD) diet fed APP/PS1 mice (n=17-20). Two-way ANOVA tests showed a trend for differences between diet groups ( $F(1, 72) = 3.623$ ,  $p=0.0610$ ). Spatial learning and memory, assessed as **b.** latency to target and **c.** % time in target quadrant in the Barnes maze test, was determined in CD and KD fed APP/PS1 mice. Two-way ANOVA tests showed a sex effect in % time in target quadrant ( $F(1, 62) = 9.739$ ,  $p=0.0027$ ). Data are presented as mean  $\pm$  SEM and include individual data points.

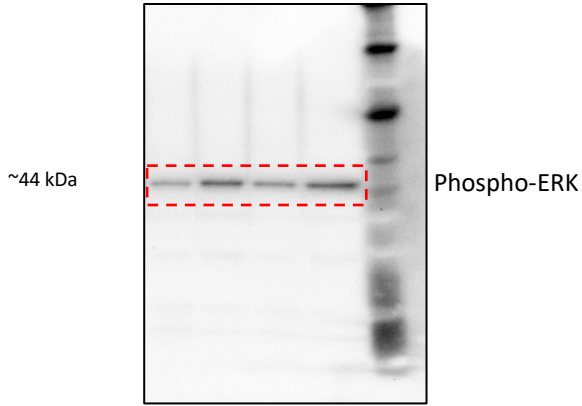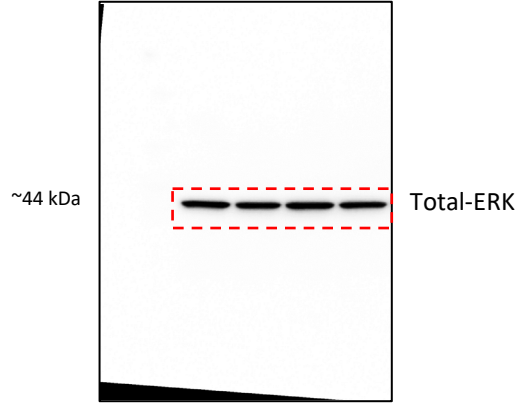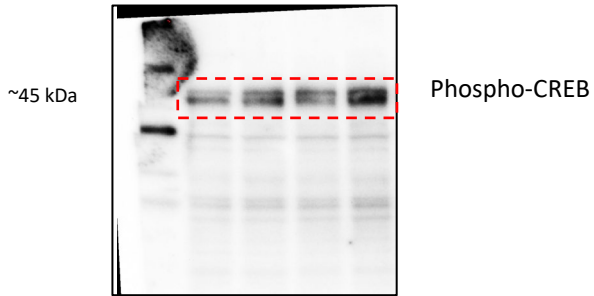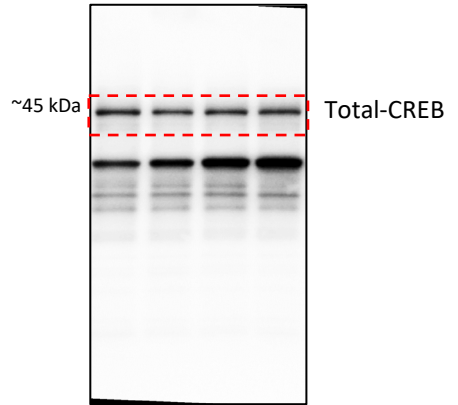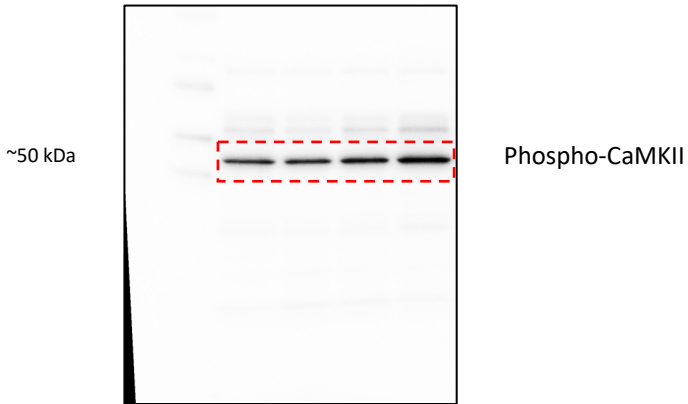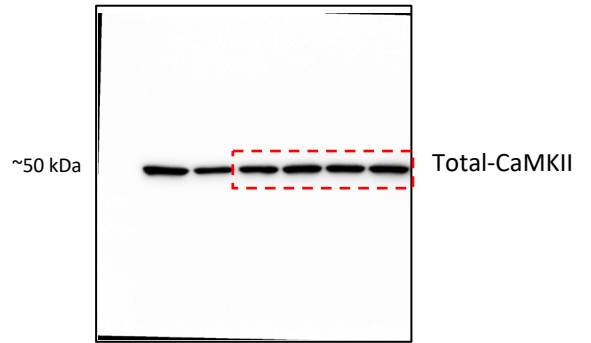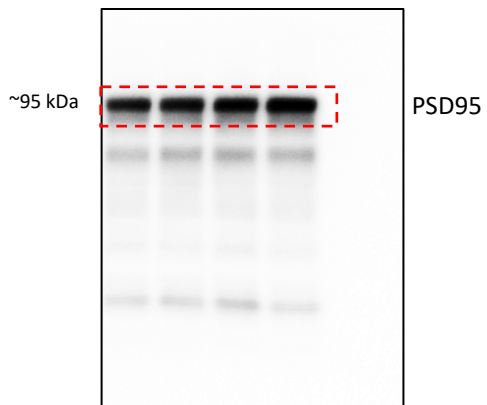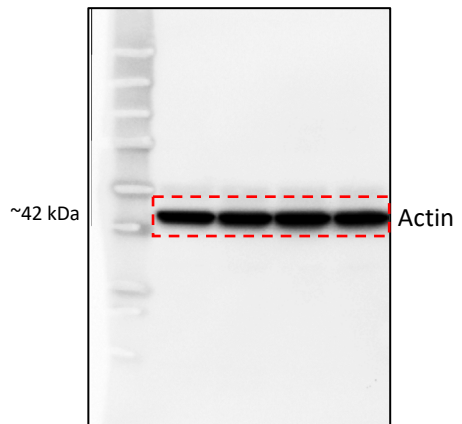

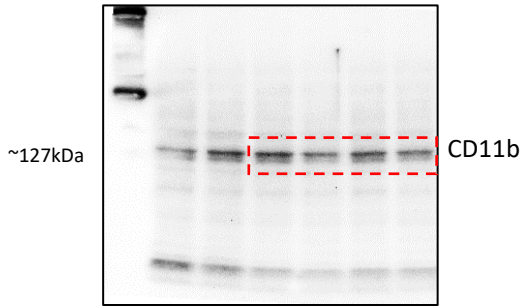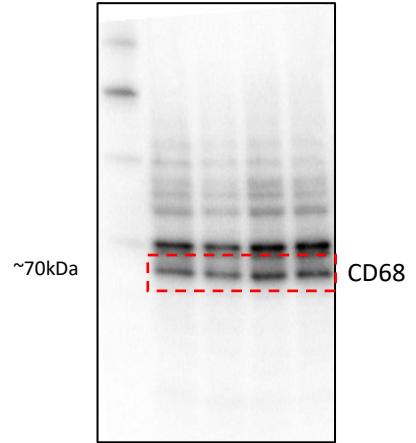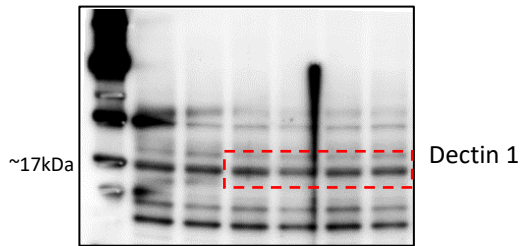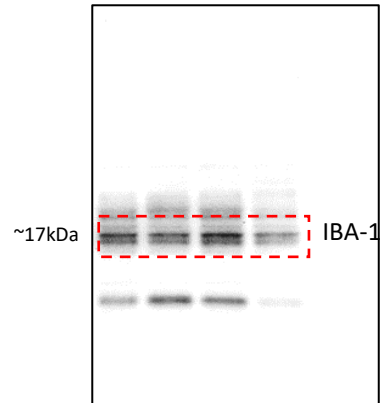

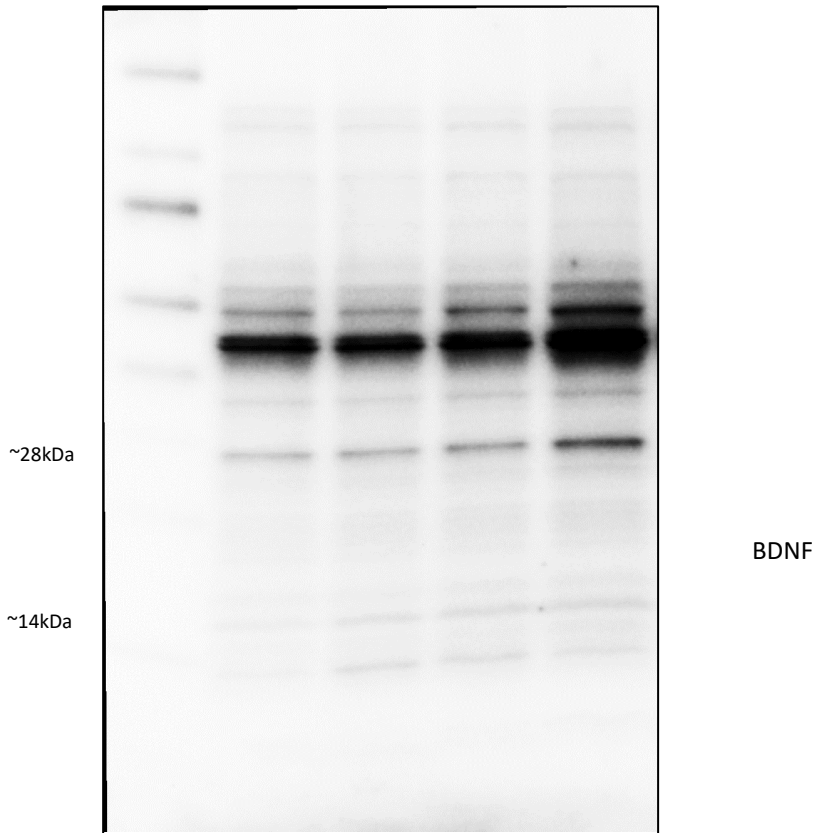

**Supplementary Figure 6:** Uncropped gel/blot
