# Supplementary material for: Ketogenic diet and BHB rescue the fall of long-term potentiation in an Alzheimer’s mouse model and stimulates synaptic plasticity pathway enzymes
Source: PubMed Central journal article supplement (PMC10873348; doi:10.1038/s42003-024-05860-z), 2024-02-16
Supplement: 42003_2024_5860_MOESM2_ESM.pdf [file 42003_2024_5860_MOESM2_ESM.pdf]

## **Description of Additional Supplementary Files**

**File name:** Supplementary Data

**Description:** The source data behind the graphs in the paper.
